# Supplementary material for: Towards the continuous production of Pt-based heterogeneous catalysts using microfluidic systems
Source: Royal Society of Chemistry journal article supplement (doi:10.1039/c7dt03360e), 2018-01-01
Supplement: c7dt03360e1.pdf [file c7dt03360e1.pdf]

Supporting Information

## Towards the continuous production of Pt-based heterogeneous catalysts using microfluidic systems

Laura Uson, Manuel Arruebo, and Victor Sebastian

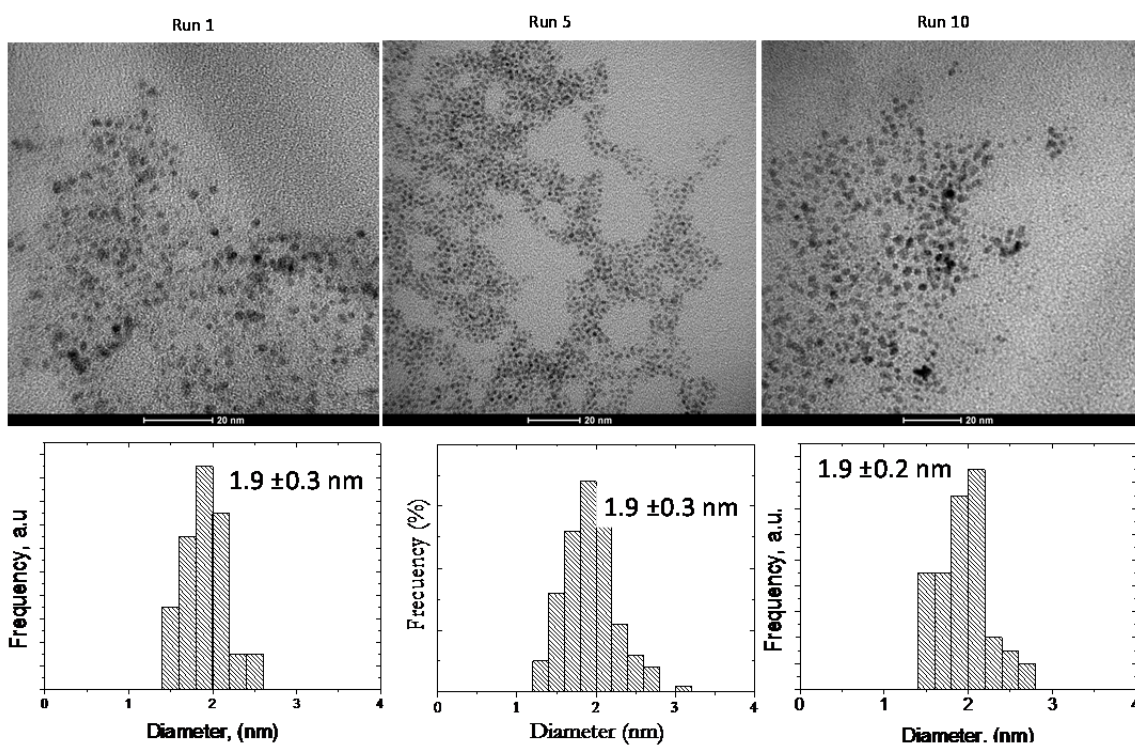

Figure S1.- TEM images of Pt NPs produced in continuous flow at 95°C and with a residence time of 90s.

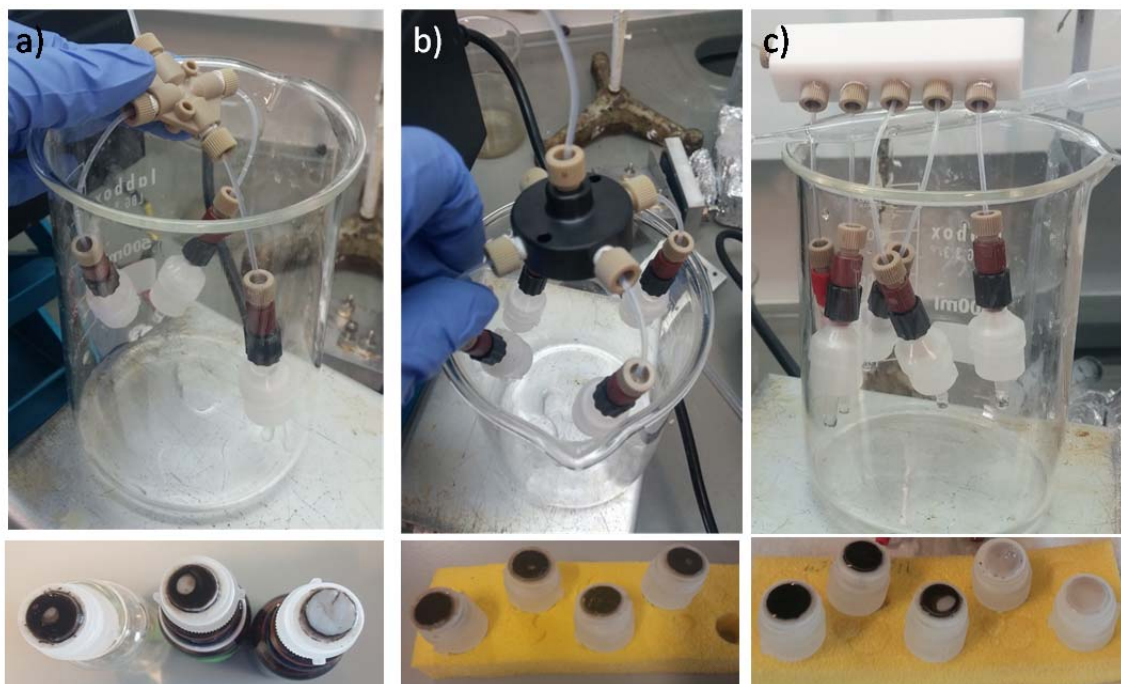

Figure S2.- Flow distributors to load Pt NPs In SBA15 nanorods and Pt-SBA-15 cake obtained after loading: a) cross-junction as three-fold distributor, b) four-fold flow splitting with inlet at the center and c) five-fold flow splitting with inlet at the side.

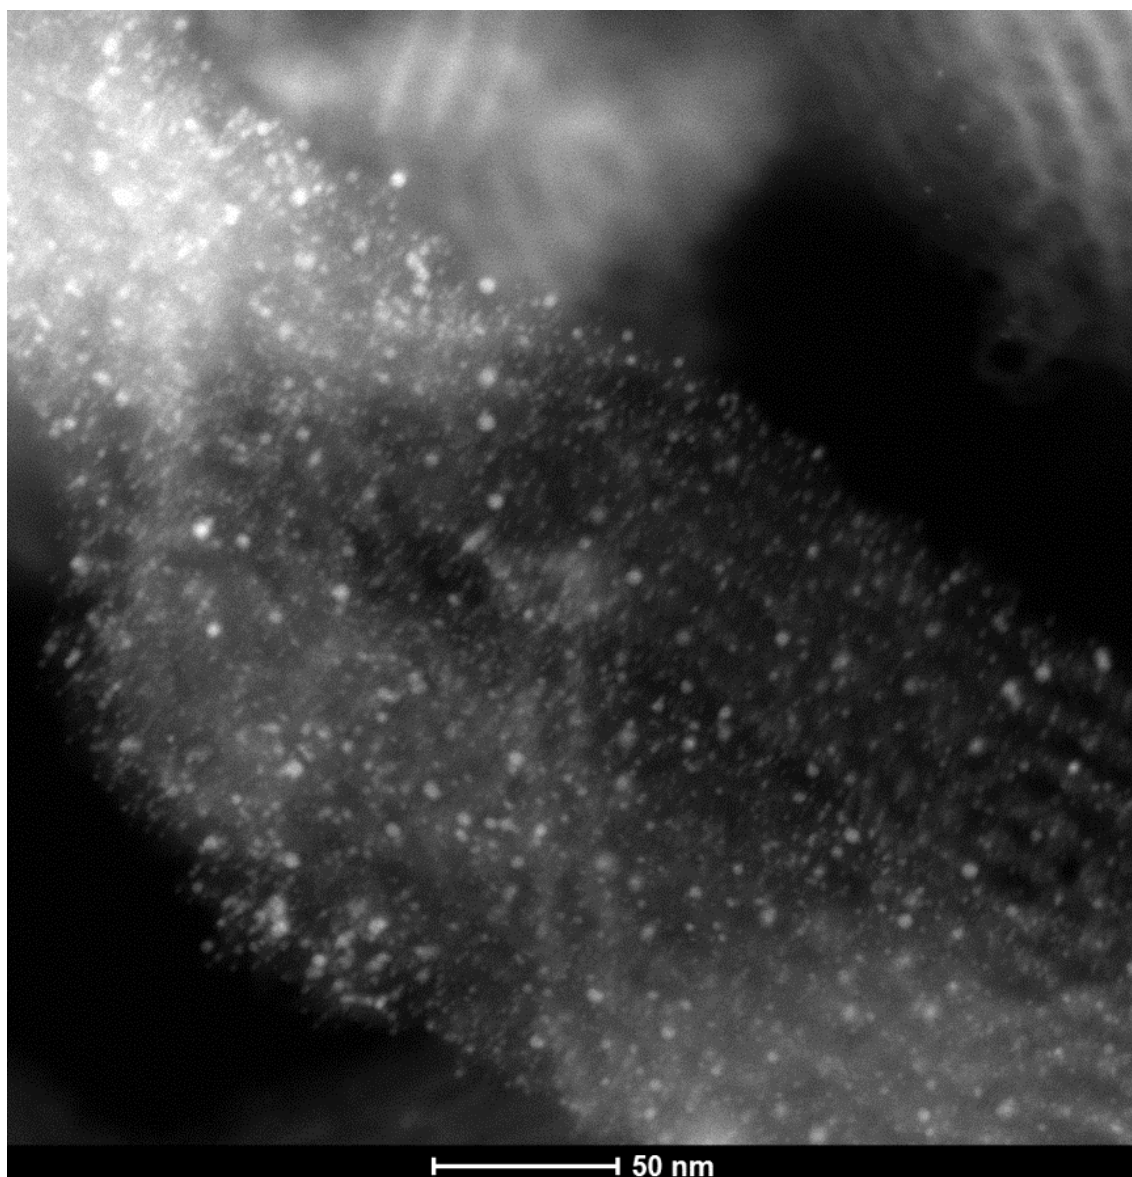

Figure S3- STEM-HAADF image of Pt NPs loaded in a mesoporous SBA-15 nanorod
